# Supplementary material for: Aqueous p-type dye-sensitized solar cells based on a tris(1,2-diaminoethane)cobalt(ii)/(iii) redox mediator
Source: Royal Society of Chemistry journal article supplement (doi:10.1039/c6gc02001a), 2016-01-01
Supplement: c6gc02001a1.pdf [file c6gc02001a1.pdf]

Supporting Information for:

# **Aqueous p-type dye-sensitized solar cells based on the tris(1,2-diaminoethane) cobalt(II)/(III) redox mediator**

Wanchun Xiang<sup>a,b\*</sup>, Joshua Marlow<sup>a</sup>, Peter Bäuerle<sup>c</sup>, Udo Bach<sup>d,e,f</sup>, Leone Spiccia<sup>a\*</sup>

<sup>a</sup>School of Chemistry, Monash University, Victoria 3800, Australia Fax: +61 3 9905 4597; Tel: +61 3 9905 4526; E-mail: [Leone.Spiccia@monash.edu](mailto:Leone.Spiccia@monash.edu)

<sup>b</sup>State Key Laboratory of Silicate Materials for Architectures, Wuhan University of Technology, Hubei, 430070, China; Email: [xiangwanchun@whut.edu.cn](mailto:xiangwanchun@whut.edu.cn)

<sup>c</sup>Institute for Organic Chemistry II and Advanced Materials, University of Ulm, Albert-Einstein-Allee 11, 89081 Ulm (Germany)

<sup>d</sup>Department of Materials Engineering, Monash University, Victoria 3800, Australia

<sup>e</sup>Commonwealth Scientific and Industrial Research Organization, Materials Science and Engineering, Flexible Electronics Theme, Clayton South, Victoria 3169, Australia

<sup>f</sup>Melbourne Centre for Nanofabrication, 151 Wellington Road, Clayton, VIC 3168, Australia

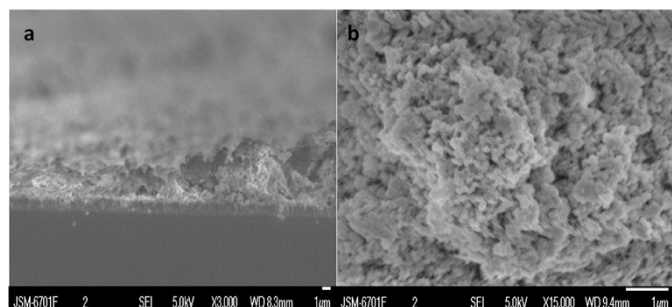

**Figure S1** Scanning electron microscope of mesoporous NiO film on FTO substrate. a) Cross-sectional image, b) top-view image.

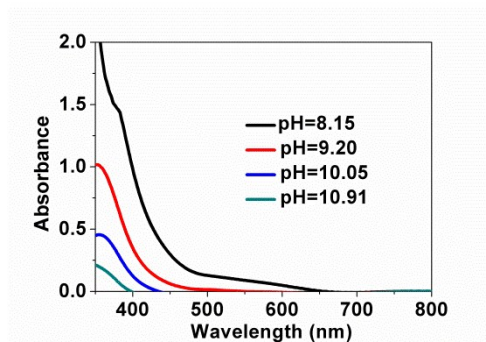

**Figure S2** UV-Visible spectra of aqueous electrolytes with different pHs. The electrolytes contained 0.6 M  $[\text{Co}(\text{en})_3](\text{BF}_4)_2$ , 0.07 M  $[\text{Co}(\text{en})_3](\text{BF}_4)_3$ , 0.9 M  $\text{LiBF}_4$  and 0.3 M NMBl in deionized water, where either boric acid or 1,2-diaminoethane were used to adjust the electrolyte pHs. An aqueous solution containing 0.9 M  $\text{LiBF}_4$  and 0.3 M NMBl was used as blank.

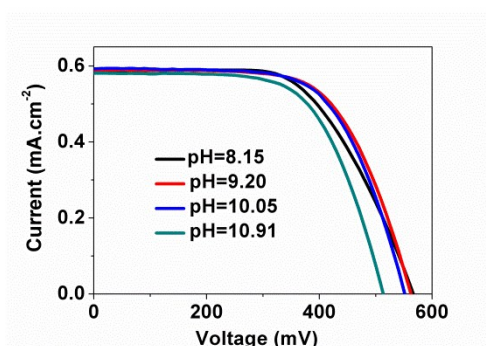

**Figure S3** J-V curves for p-type DSCs based on  $[\text{Co}(\text{en})_3]^{2+/3+}$  electrolytes with different pHs at 0.1 sun light intensity illumination.

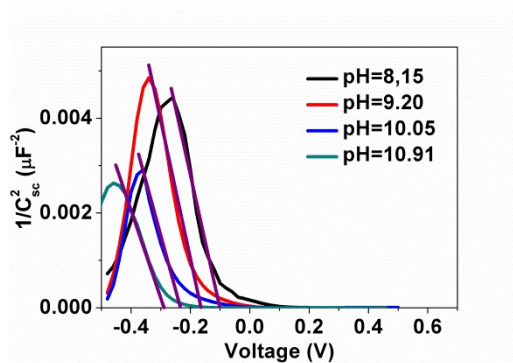

**Figure S4** Mott-Schottky behavior of NiO contacting with different pH electrolytes. The experiment was carried out by a three-electrodes setup. A 7×7 mm NiO film was used for working electrode. Platinum wire and Ag/AgCl were used as counter and reference electrodes, respectively. Boric acid and 1,2-diaminoethane were used to adjust the pH of the electrolytes. The scan range was from -0.5 V to 0.5 V vs Ag/AgCl and the frequency was chosen at 1 Hz for figure plotting. The linear fitting results were extrapolated to  $1/(C_{\text{sc}})^2 = 0$ .

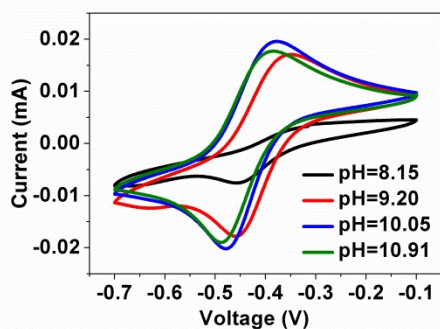

**Figure S5** Cyclic voltammetry of  $[\text{Co}(\text{en})_3]^{2+/3+}$  redox mediator in different pH electrolytes. The measurement was conducted at a  $20 \text{ mV s}^{-1}$  scan rate in the range of  $-0.7$  to  $-0.1 \text{ V}$  vs  $\text{Ag}/\text{AgCl}$ . The aqueous electrolyte solution contained  $6 \text{ mM } [\text{Co}(\text{en})_3](\text{BF}_4)_2$ ,  $0.7 \text{ mM } [\text{Co}(\text{en})_3](\text{BF}_4)_3$  and  $0.1 \text{ M}$  potassium chloride, in water, where boric acid and extra 1,2-diaminoethane were used to adjust electrolyte pHs.

**Table S1** Optimization of  $[\text{Co}(\text{en})_3](\text{BF}_4)_2$  concentration in aqueous electrolytes used in p-type DSCs at a pHs of 8.15. Other components in electrolyte are:  $0.10 \text{ M } [\text{Co}(\text{en})_3](\text{BF}_4)_3$ ,  $0.10 \text{ M}$  NMBl,  $0.50 \text{ M}$   $\text{LiBF}_4$  in water. The NiO film thickness is  $2.4 \mu\text{m}$ . Device performance data is the average of at least three devices. Photovoltaic parameters were recorded under light intensities of  $1000 \text{ mW cm}^{-2}$ .

| $[\text{Co}(\text{en})_3](\text{BF}_4)_2 \text{ (M)}$ | $V_{\text{oc}}$ (mV) | $J_{\text{sc}}$ ( $\text{mA cm}^{-2}$ ) | $FF$            | $\eta$ (%)      |
|-------------------------------------------------------|----------------------|-----------------------------------------|-----------------|-----------------|
| 0.2                                                   | $584 \pm 3$          | $3.52 \pm 0.02$                         | $0.29 \pm 0.01$ | $0.60 \pm 0.10$ |
| 0.4                                                   | $572 \pm 5$          | $3.81 \pm 0.01$                         | $0.34 \pm 0.01$ | $0.73 \pm 0.06$ |
| 0.6                                                   | $564 \pm 4$          | $4.44 \pm 0.01$                         | $0.40 \pm 0.01$ | $1.01 \pm 0.05$ |
| 0.8                                                   | $553 \pm 6$          | $4.52 \pm 0.01$                         | $0.39 \pm 0.01$ | $0.97 \pm 0.07$ |

**Table S2** Optimization of  $[\text{Co}(\text{en})_3](\text{BF}_4)_3$  concentration in aqueous electrolytes used in p-type DSCs at a pH of 8.15. Other components in electrolyte are:  $0.60 \text{ M } [\text{Co}(\text{en})_3](\text{BF}_4)_2$ ,  $0.10 \text{ M}$  NMBl,  $0.70 \text{ M}$   $\text{LiBF}_4$  in water (NiO film thickness is  $2.4 \mu\text{m}$ ; photovoltaic parameters recorded at  $1000 \text{ mW cm}^{-2}$ ; data averaged for at least three devices).

| $[\text{Co}(\text{en})_3](\text{BF}_4)_3 \text{ (M)}$ | $V_{\text{oc}}$ (mV) | $J_{\text{sc}}$ ( $\text{mA cm}^{-2}$ ) | $FF$            | $\eta$ (%)      |
|-------------------------------------------------------|----------------------|-----------------------------------------|-----------------|-----------------|
| 0.07                                                  | $582 \pm 8$          | $5.90 \pm 0.04$                         | $0.41 \pm 0.01$ | $1.42 \pm 0.17$ |
| 0.27                                                  | $600 \pm 6$          | $4.85 \pm 0.02$                         | $0.41 \pm 0.01$ | $1.19 \pm 0.13$ |
| 0.47                                                  | $615 \pm 7$          | $4.72 \pm 0.05$                         | $0.42 \pm 0.01$ | $1.22 \pm 0.11$ |
| 0.67                                                  | $595 \pm 5$          | $4.22 \pm 0.02$                         | $0.45 \pm 0.01$ | $1.13 \pm 0.10$ |

**Table S3** Optimization of NMBl concentration in aqueous electrolyte used in p-type DSCs at a pH of 8.15. Other components in electrolyte are:  $0.2 \text{ M } [\text{Co}(\text{en})_3](\text{BF}_4)_2$ ,  $0.10 \text{ M } [\text{Co}(\text{en})_3](\text{BF}_4)_3$ ,  $0.30 \text{ M}$   $\text{LiBF}_4$  in water (NiO film thickness is  $2.4 \mu\text{m}$ ; photovoltaic parameters recorded at  $1000 \text{ mW cm}^{-2}$ ; data averaged for at least three devices).

| NMBl (M) | $V_{\text{oc}}$ (mV) | $J_{\text{sc}}$ ( $\text{mA cm}^{-2}$ ) | $FF$            | $\eta$ (%)      |
|----------|----------------------|-----------------------------------------|-----------------|-----------------|
| 0        | $362 \pm 5$          | $0.67 \pm 0.01$                         | $0.47 \pm 0.01$ | $0.11 \pm 0.03$ |
| 0.1      | $696 \pm 8$          | $2.79 \pm 0.04$                         | $0.23 \pm 0.01$ | $0.45 \pm 0.09$ |
| 0.3      | $684 \pm 6$          | $3.64 \pm 0.07$                         | $0.23 \pm 0.01$ | $0.57 \pm 0.17$ |
| 0.5      | $672 \pm 7$          | $1.68 \pm 0.01$                         | $0.25 \pm 0.01$ | $0.28 \pm 0.07$ |

**Table S4** Optimization of  $\text{LiBF}_4$  concentration in aqueous electrolyte for p-type DSCs at a pH of 8.15. Other components in electrolyte are:  $0.60 \text{ M } [\text{Co}(\text{en})_3](\text{BF}_4)_2$ ,  $0.10 \text{ M } [\text{Co}(\text{en})_3](\text{BF}_4)_3$ ,  $0.30 \text{ M}$  NMBl in water (NiO film thickness is  $2.4 \mu\text{m}$ ; photovoltaic parameters recorded at  $1000 \text{ mW cm}^{-2}$ ; data averaged for at least three devices).

| $\text{LiBF}_4$ (M) | $V_{\text{oc}}$ (mV) | $J_{\text{sc}}$ ( $\text{mA cm}^{-2}$ ) | $FF$            | $\eta$ (%)      |
|---------------------|----------------------|-----------------------------------------|-----------------|-----------------|
| 0                   | $531 \pm 2$          | $0.43 \pm 0.01$                         | $0.59 \pm 0.01$ | $0.14 \pm 0.02$ |
| 0.5                 | $553 \pm 7$          | $3.35 \pm 0.02$                         | $0.41 \pm 0.01$ | $0.75 \pm 0.16$ |
| 0.7                 | $583 \pm 10$         | $4.79 \pm 0.08$                         | $0.41 \pm 0.01$ | $1.14 \pm 0.20$ |
| 0.9                 | $609 \pm 8$          | $6.02 \pm 0.05$                         | $0.40 \pm 0.01$ | $1.46 \pm 0.17$ |
| 1.2                 | $581 \pm 8$          | $6.14 \pm 0.10$                         | $0.40 \pm 0.01$ | $1.42 \pm 0.13$ |

**Table S5** Optimization of NiO film thickness for aqueous p-type DSCs assembled using an electrolyte with pH of 8.15. The components in electrolyte are:  $0.20 \text{ M } [\text{Co}(\text{en})_3](\text{BF}_4)_2$ ,  $0.10 \text{ M } [\text{Co}(\text{en})_3](\text{BF}_4)_3$ ,  $0.10 \text{ M}$  NMBl,  $0.30 \text{ M}$   $\text{LiBF}_4$  in water (NiO film thickness is  $2.4 \mu\text{m}$ ; photovoltaic parameters recorded at  $1000 \text{ mW cm}^{-2}$ ; data averaged for at least three devices).

| Thickness ( $\mu\text{m}$ ) | $V_{\text{oc}}$ (mV) | $J_{\text{sc}}$ ( $\text{mA cm}^{-2}$ ) | $FF$            | $\eta$ (%)      |
|-----------------------------|----------------------|-----------------------------------------|-----------------|-----------------|
| 0.8                         | $692 \pm 10$         | $2.81 \pm 0.05$                         | $0.25 \pm 0.01$ | $0.49 \pm 0.20$ |
| 1.6                         | $689 \pm 8$          | $4.13 \pm 0.07$                         | $0.27 \pm 0.01$ | $0.77 \pm 0.19$ |
| 2.4                         | $682 \pm 7$          | $4.30 \pm 0.05$                         | $0.30 \pm 0.01$ | $0.89 \pm 0.17$ |
| 3.2                         | $661 \pm 6$          | $4.22 \pm 0.04$                         | $0.29 \pm 0.01$ | $0.80 \pm 0.10$ |
| 4.0                         | $651 \pm 7$          | $4.12 \pm 0.04$                         | $0.24 \pm 0.01$ | $0.65 \pm 0.11$ |

**Table S6** Valence band potentials ( $E_{VB}$ ) and acceptor-state densities ( $N_A$ ) of NiO in contact with different pH electrolytes. Data were fitted and calculated from Mott-Schottky curves in **Figure S4** using equation (1) given in main text.

| pH    | $E_{VB}$ (V vs NHE)<br>extrapolated | $N_A(\times 10^{19}\text{cm}^{-3})$ |
|-------|-------------------------------------|-------------------------------------|
| 8.15  | 0.30±0.04                           | 2.23±0.06                           |
| 9.20  | 0.24±0.02                           | 2.05±0.13                           |
| 10.05 | 0.17±0.06                           | 1.91±0.08                           |
| 10.91 | 0.11±0.04                           | 1.82±0.04                           |

**Table S7** Parameters obtained by CV measurements for the redox mediators with different pH electrolytes (vs NHE).

| pH    | $E_{Ox}$ (V)   | $E_{Red}$ (V) | $E_{Mid}$ (V) | $\Delta E (= E_{Ox} - E_{Red})$ (V) | $I_{Ox}/I_{Red}$ |
|-------|----------------|---------------|---------------|-------------------------------------|------------------|
| 8.15  | -<br>0.14±0.04 | -0.25±0.03    | -0.19±0.06    | 0.12±0.03                           | 0.44±0.03        |
| 9.20  | -<br>0.16±0.06 | -0.26±0.03    | -0.21±0.05    | 0.10±0.05                           | 1.03±0.06        |
| 10.05 | -<br>0.19±0.03 | -0.27±0.02    | -0.23±0.03    | 0.08±0.02                           | 0.99±0.02        |
| 10.91 | -<br>0.19±0.03 | -0.28±0.04    | -0.24±0.04    | 0.09±0.03                           | 0.97±0.04        |
